# Supplementary material for: Tunable electrorheological characteristics and mechanism of a series of graphene-like molybdenum disulfide coated core–shell structured polystyrene microspheres
Source: Royal Society of Chemistry journal article supplement (doi:10.1039/c5ra25467a), 2016-01-01
Supplement: c5ra25467a1.pdf [file c5ra25467a1.pdf]

## Electronics Supplementary Information (ESI)

### **Tunable electrorheological characteristics and mechanism of a series of graphene-like molybdenum disulfide coated core-shell structured polystyrene microspheres**

Xiaowen Wang, Xing Qian, Xiancai Jiang, Zhen Lu and Linxi Hou\*

*School of Chemical Engineering, Institute of Petrochemical Technology, Fuzhou University, Fuzhou, Fujian, 350108, China.*

\*E-mail: lxhou@fzu.edu.cn.

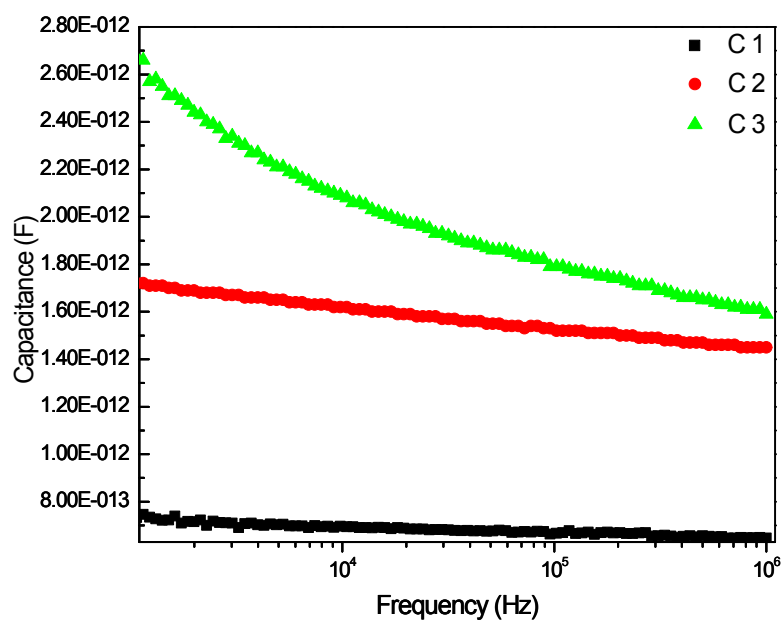

**Figure S1.** Capacitance properties of pure PS coated by different weight fractions of MoS<sub>2</sub>, showing apparent rising trend of capacitance when the content of MoS<sub>2</sub> changed from C 1 to C 3.

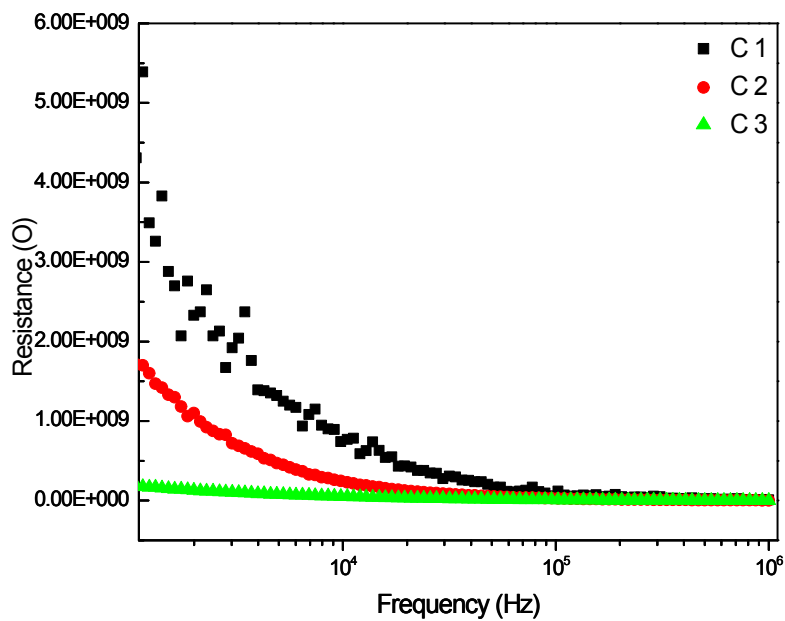

**Figure S2.** Resistance properties of pure PS coated by different weight fractions of MoS<sub>2</sub>, showing apparent decline trend of resistance when the content of MoS<sub>2</sub> changed from C 1 to C 3.
